# Supplementary material
Source: Royal Society of Chemistry journal article supplement (doi:10.1039/d6dt00874g)
Supplement: d6dt00874g1.pdf [file d6dt00874g1.pdf]

Supplementary Information (SI) for Dalton Transactions.

This journal is © The Royal Society of Chemistry 2026

SUPPORTING INFORMATION for:

## Synthesis of One-Dimensional Silver Nanowires in Aqueous Using Phloroglucinol as Reducing Reagent

*Yecheng Lu<sup>a</sup>, Wenlong Wang<sup>a</sup>, Ruijing Li<sup>a</sup>, Shilong Wang<sup>a</sup>, Cheng Wang<sup>a,\*</sup>*

<sup>a</sup>Institute for New Energy Materials and Low-Carbon Technologies, School of  
Materials Science and Engineering, Tianjin Key Laboratory of Advanced Functional  
Porous Materials, Tianjin University of Technology, Tianjin, 300384, China

### Table of Contents

|                          |    |
|--------------------------|----|
| A. Supplementary Figures | S2 |
| B. Supplementary Table   | S7 |
| C. References            | S9 |

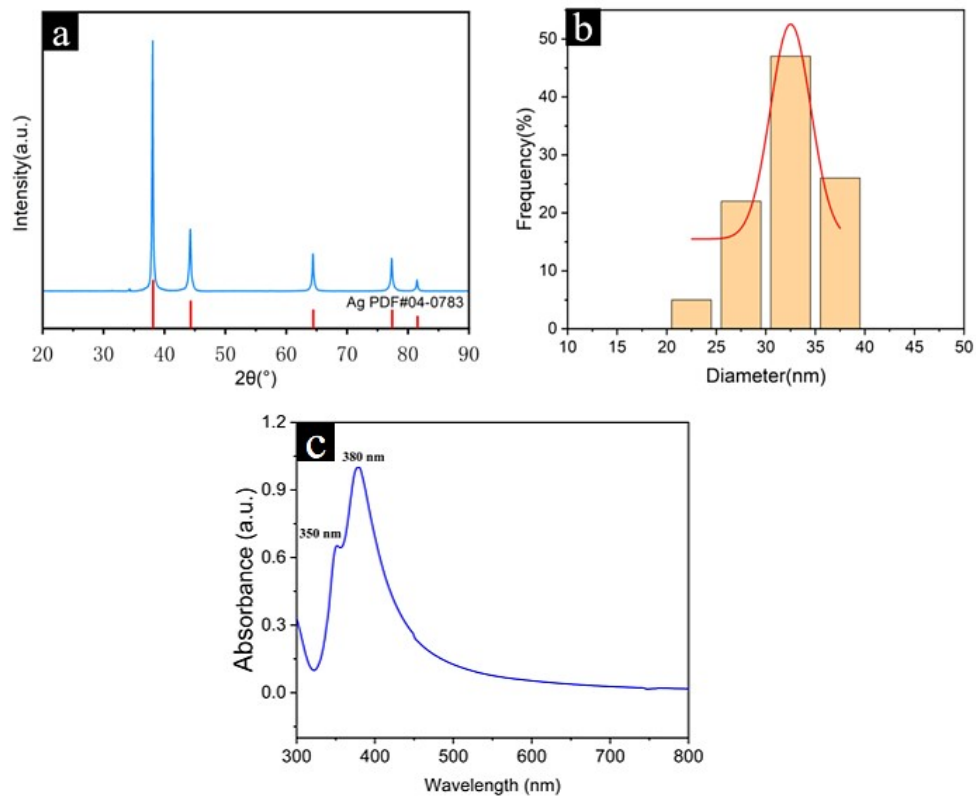

**Fig S1.** (a) XRD pattern of the AgNWs, (b) Diameter distribution of the AgNWs, (c) the UV-vis spectrum of AgNWs.

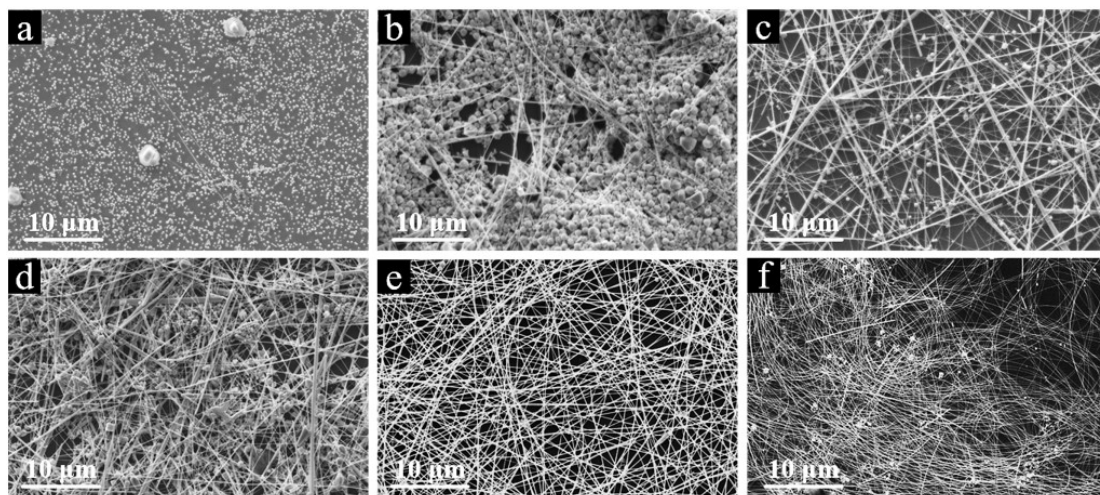

**Fig S2.** images of the products obtained at different temperatures (a) 80 °C, (b) 100 °C, (c) 120 °C, (d) 140 °C, (e) 160 °C, and (f) 180 °C

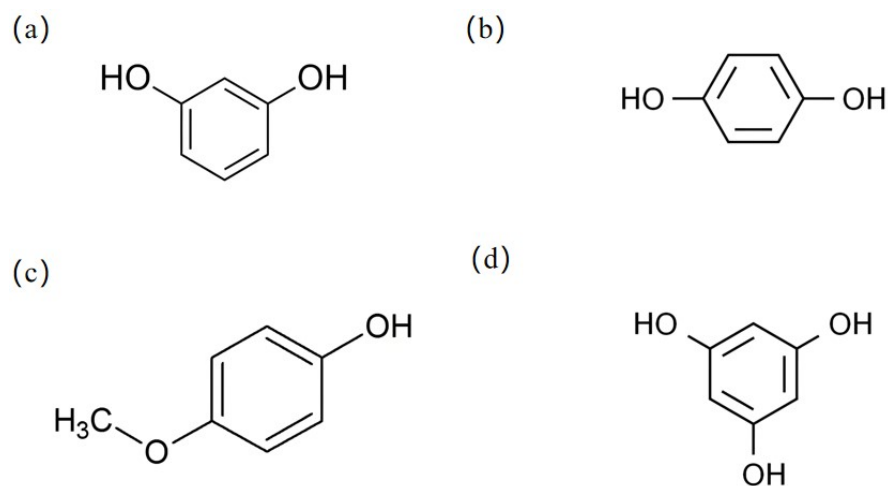

**Fig S3.** Schematic structures of different phenolic derivatives. (a) Resorcinol, (b) Hydroquinone, (c) 4-methoxyphenol, (d) Phloroglucinol

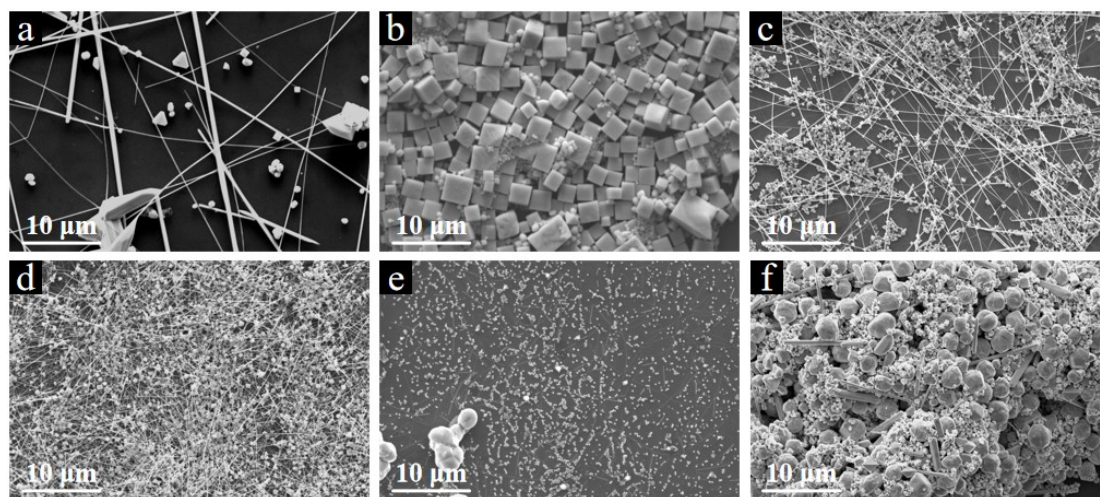

**Fig S4.** SEM images of AgNWs prepared in the presence of different kinds of chlorides: (a)  $\text{NH}_4\text{Cl}$ , (b)  $\text{NiCl}_2$ , (c)  $\text{FeCl}_3$ , (d)  $\text{KCl}$ , (e)  $\text{MnCl}_2$ , and (f)  $\text{CuCl}_2$

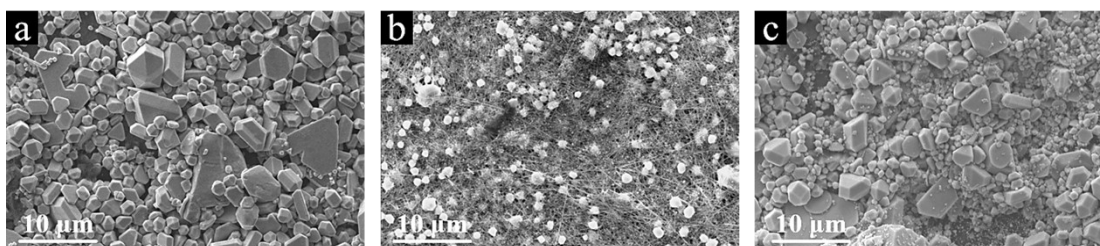

**Fig S5.** SEM images of AgNWs obtained at different molar ratio of  $\text{Cl}^-/\text{Br}^-$ : (a) 1:1, (b) 2:1, (c) 3:1

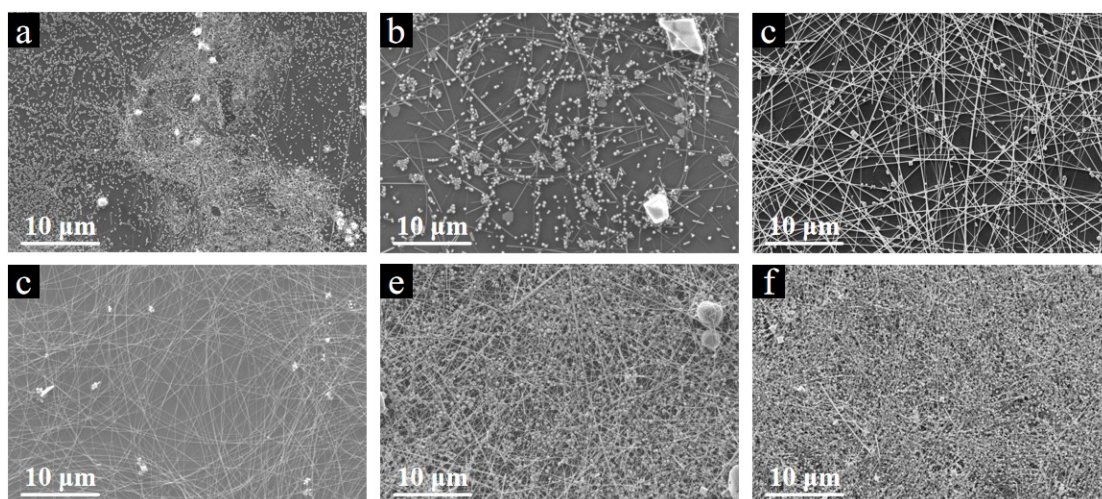

**Fig S6.** SEM images of the products obtained at different concentration of PVP (a) 70, (b) 80, (c) 90, (d) 100, (e) 110, and (f) 120 mM

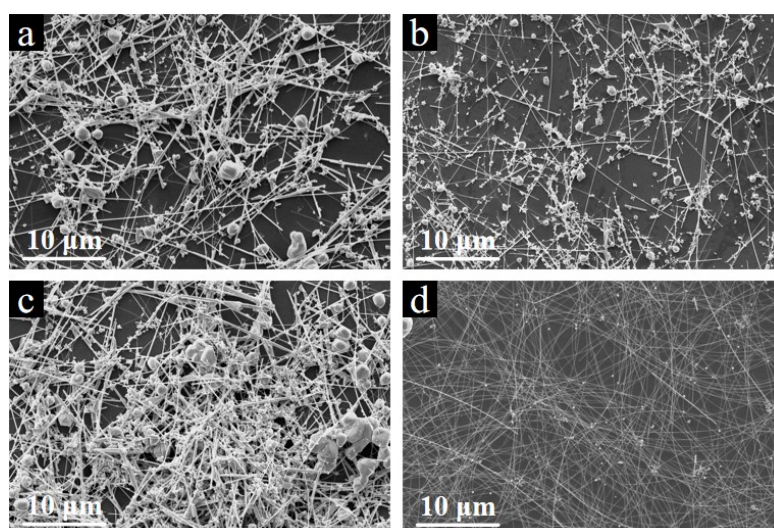

**Fig S7.** SEM images of the products obtained at different molecular weight of PVP (a) K23-27, (b) K30, (c) K60, (d) K90

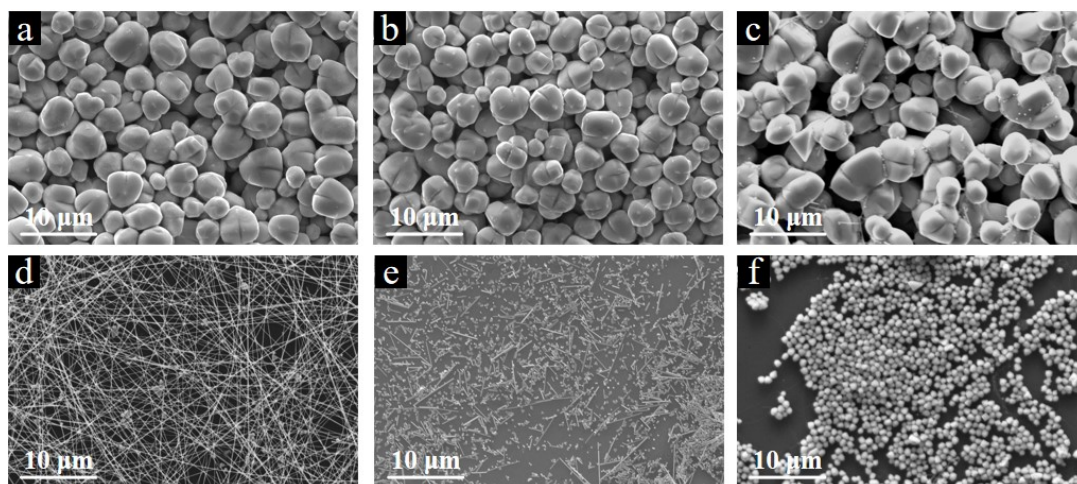

**Fig S8.** SEM images of the products obtained at different PH (a) 4.0, (b) 5.0, (c) 6.0, (d) 7.0, (e) 8.0, and (f) 9.0

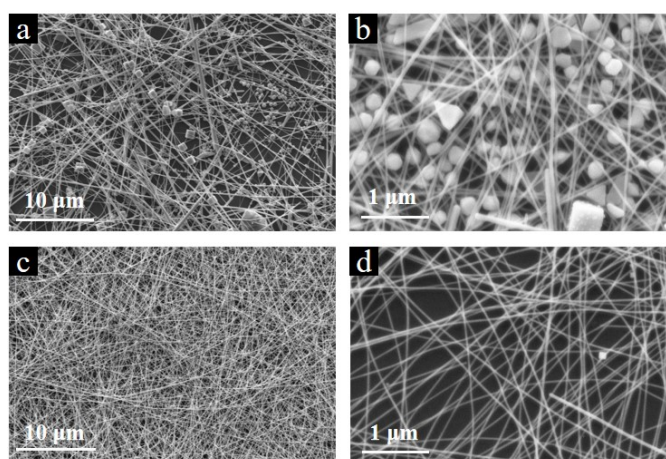

**Fig S9.** SEM images of AgNWs samples (a, b) before purification and (c, d) after purification.

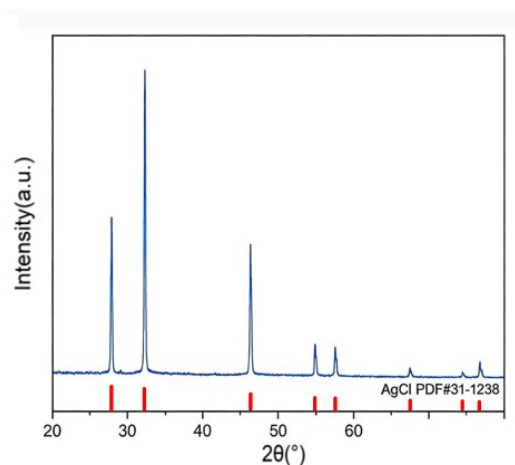

**Fig S10.** XRD pattern of the product after 6 h.

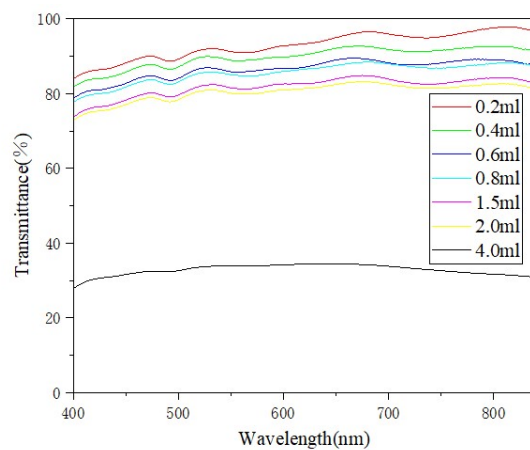

**Fig S11.** Optical Transmittance of Silver Nanowire TCFs under Different Spraying Volumes

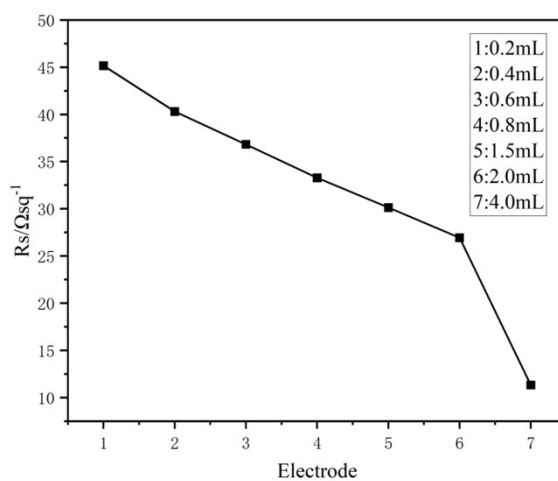

**Fig S12.** Sheet Resistance of TCFs Under Varying Spray Amounts

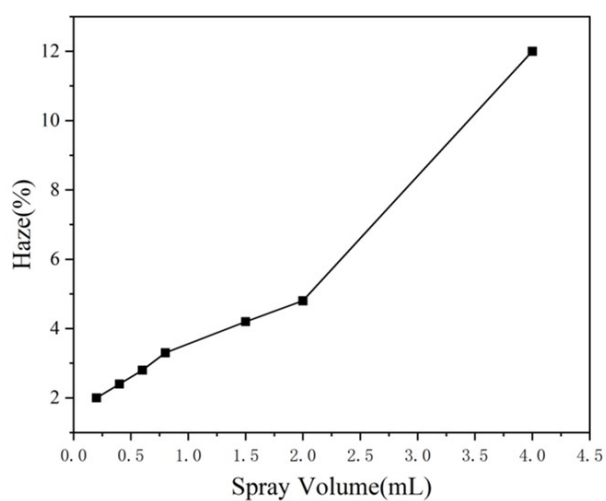

**Fig S13.** The haze of the TCF

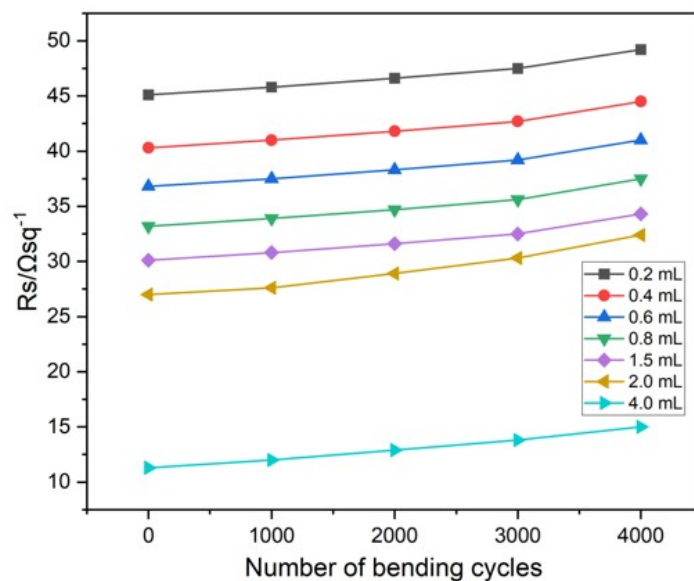

**Fig S14.** Sheet Resistance of AgNW-TCFs under Different Bending Cycles

**Table S1** Synthesis of high aspect ratio AgNWs via different preparation methods.

| Synthetic Method    | Reducing Agent                | Diameter /nm | Length/ $\mu\text{m}$ | $\alpha$ | Ref. |
|---------------------|-------------------------------|--------------|-----------------------|----------|------|
|                     | EG                            | 72           |                       | 4000     | 1    |
| Polyol Method       | EG                            | 80-100       | 10-15                 | -        | 2    |
|                     | EG                            | 56           | 12                    |          | 3    |
|                     | H <sub>2</sub> O <sub>2</sub> | 100          | 160                   | -        | 4    |
| Hydrothermal Method | Glucose                       | 15           | -                     | 1000     | 5    |
|                     | Ascorbic acid                 | 17           | -                     | 1000     | 6    |
|                     | EG                            | 15-40        | 110                   | 3200     | 7    |
| This work           | Phloroglucinol                | 32           | 100                   | 3000     |      |

**Table S2** Synthesis of AgNWs and AgNW-TCFs with different methods.

| Synthetic Method    | Solvent          | Reaction temperature /time | Resistance/transmittance | Haze     | Ref. |
|---------------------|------------------|----------------------------|--------------------------|----------|------|
| Polyol Method       | EG               | 150 °C<br>150 min          | 22.4 Ω/sq<br>87.71%      | 4.15%    | 1    |
| Polyol Method       | EG               | 160 °C<br>120 min          | 0.091 Ω/sq<br>45-46%     | -        | 2    |
| Polyol Method       | EG               | 160 °C<br>120 min          | 6.82 Ω/sq                | -        | 3    |
| Hydrothermal Method | H <sub>2</sub> O | 165 °C<br>24 h             | -                        |          | 4    |
| Hydrothermal Method | H <sub>2</sub> O | 170 °C<br>6 h              | 20 Ω/sq<br>94.5%         | ≤1.0%    | 5    |
| Hydrothermal Method | H <sub>2</sub> O | 90 °C                      | -                        |          | 6    |
| Hydrothermal Method | H <sub>2</sub> O | 130 °C<br>6 h              | 16.5 Ω/sq<br>88%         | 4.2%     | 7    |
| This work           | H <sub>2</sub> O | 160°C<br>24 h              | 11.33 Ω/sq<br>90%        | 2.0-4.8% |      |

**Table S3** Optical and electrical properties of AgNW-TCFs.

| Spraying amount of AgNWs | Transmittance (%) | Resistance ( $\Omega/\text{sq}$ ) | FOM ( $T^{10}/R_s$ )       |
|--------------------------|-------------------|-----------------------------------|----------------------------|
| 0.2 mL                   | ~89.9             | ~45.2                             | $\sim 7.63 \times 10^{-3}$ |
| 0.4 mL                   | ~87.8             | ~40.2                             | $\sim 6.77 \times 10^{-3}$ |
| 0.6 mL                   | ~85.8             | ~36.8                             | $\sim 5.88 \times 10^{-3}$ |
| 0.8 mL                   | ~84.0             | ~33.3                             | $\sim 5.25 \times 10^{-3}$ |
| 1.5 mL                   | ~82.2             | ~30.1                             | $\sim 4.68 \times 10^{-3}$ |
| 2.0 mL                   | ~81.2             | ~27.0                             | $\sim 4.62 \times 10^{-3}$ |
| 4.0 mL                   | ~34.0             | ~11.3                             | $\sim 1.83 \times 10^{-6}$ |

#### References

1. Z. Y. Fan, J. Y. Wang, L. L. He, B. Shen, J. Chen, H. M. Mao, Y. Ren, J. A. Yin, H. Cui and H. W. Yang, *Langmuir*, 2023, 39, 10651-10659.
2. Z. Zhang, Y. Zheng, P. He and Z. Sun, *Physica E-Low-Dimensional Systems & Nanostructures*, 2011, 44, 535-540.
3. S. Fahad, H. Yu, L. Wang, A. Nazir, R. S. Ullah, K.-u.-R. Naveed, T. Elshaarani, B. Ul Amin, A. Khan and S. Mehmood, *Journal of Materials Science-Materials in Electronics*, 2019, 30, 12876-12887.
4. M. Cwik, D. Buczynska, K. Sulowska, E. Rozniecka, S. Mackowski and J. Niedziolka-Joensson, *Materials*, 2019, 12.
5. H.-W. Jang, Y.-H. Kim, K.-W. Lee, Y.-M. Kim and J.-Y. Kim, *Apl Materials*, 2017, 5.
6. F. Qin, H. Zhang, T. Tan, J. Wang, H. Liu and C. Wang, *Chemistry of Materials*, 2022, 34, 4613-4620.
7. T. Yang, L. Zhao, H. Su, X. Song, Y. Ma, M. Hao, D. Jiang, Y. Chen and Y. Song, *Journal of Nanoparticle Research*, 2023, 25.
